# Supplementary material for: The effect of preprocessing filters on predictive performance in radiomics
Source: PubMed Central journal article supplement (PMC9433552; doi:10.1186/s41747-022-00294-w), 2022-09-01
Supplement: 41747_2022_294_MOESM1_ESM.pdf [file 41747_2022_294_MOESM1_ESM.pdf]

## **ELECTRONIC SUPPLEMENTARY MATERIAL**

### **The effect of preprocessing filters on predictive performance in radiomics**

#### ***Full list of extracted features***

##### **Common features for all preprocessing filters**

firstorder\_10Percentile

firstorder\_90Percentile

firstorder\_Energy

firstorder\_Entropy

firstorder\_InterquartileRange

firstorder\_Kurtosis

firstorder\_Maximum

firstorder\_Mean

firstorder\_MeanAbsoluteDeviation

firstorder\_Median

firstorder\_Minimum

firstorder\_Range

firstorder\_RobustMeanAbsoluteDeviation

firstorder\_RootMeanSquared

firstorder\_Skewness

firstorder\_TotalEnergy

firstorder\_Uniformity

firstorder\_Variance

glcm\_Autocorrelation

glcm\_ClusterProminence  
glcm\_ClusterShade  
glcm\_ClusterTendency  
glcm\_Contrast  
glcm\_Correlation  
glcm\_DifferenceAverage  
glcm\_DifferenceEntropy  
glcm\_DifferenceVariance  
glcm\_Id  
glcm\_Idm  
glcm\_Idmn  
glcm\_Idn  
glcm\_Imc1  
glcm\_Imc2  
glcm\_InverseVariance  
glcm\_JointAverage  
glcm\_JointEnergy  
glcm\_JointEntropy  
glcm\_MaximumProbability  
glcm\_SumEntropy  
glcm\_SumSquares  
gldm\_DependenceEntropy  
gldm\_DependenceNonUniformity  
gldm\_DependenceNonUniformityNormalized  
gldm\_DependenceVariance  
gldm\_GrayLevelNonUniformity

gldm\_GrayLevelVariance  
gldm\_HighGrayLevelEmphasis  
gldm\_LargeDependenceEmphasis  
gldm\_LargeDependenceHighGrayLevelEmphasis  
gldm\_LargeDependenceLowGrayLevelEmphasis  
gldm\_LowGrayLevelEmphasis  
gldm\_SmallDependenceEmphasis  
gldm\_SmallDependenceHighGrayLevelEmphasis  
gldm\_SmallDependenceLowGrayLevelEmphasis  
glrlm\_GrayLevelNonUniformity  
glrlm\_GrayLevelNonUniformityNormalized  
glrlm\_GrayLevelVariance  
glrlm\_HighGrayLevelRunEmphasis  
glrlm\_LongRunEmphasis  
glrlm\_LongRunHighGrayLevelEmphasis  
glrlm\_LongRunLowGrayLevelEmphasis  
glrlm\_LowGrayLevelRunEmphasis  
glrlm\_RunEntropy  
glrlm\_RunLengthNonUniformity  
glrlm\_RunLengthNonUniformityNormalized  
glrlm\_RunPercentage  
glrlm\_RunVariance  
glrlm\_ShortRunEmphasis  
glrlm\_ShortRunHighGrayLevelEmphasis  
glrlm\_ShortRunLowGrayLevelEmphasis  
glszm\_GrayLevelNonUniformity

glszm\_GrayLevelNonUniformityNormalized  
glszm\_GrayLevelVariance  
glszm\_HighGrayLevelZoneEmphasis  
glszm\_LargeAreaEmphasis  
glszm\_LargeAreaHighGrayLevelEmphasis  
glszm\_LargeAreaLowGrayLevelEmphasis  
glszm\_LowGrayLevelZoneEmphasis  
glszm\_SizeZoneNonUniformity  
glszm\_SizeZoneNonUniformityNormalized  
glszm\_SmallAreaEmphasis  
glszm\_SmallAreaHighGrayLevelEmphasis  
glszm\_SmallAreaLowGrayLevelEmphasis  
glszm\_ZoneEntropy  
glszm\_ZonePercentage  
glszm\_ZoneVariance  
ngtdm\_Busyness  
ngtdm\_Coarseness  
ngtdm\_Complexity  
ngtdm\_Contrast  
ngtdm\_Strength

### **Features in Original**

shape\_Elongation  
shape\_Flatness  
shape\_LeastAxisLength  
shape\_MajorAxisLength

shape\_Maximum2DDiameterColumn

shape\_Maximum2DDiameterRow

shape\_Maximum2DDiameterSlice

shape\_Maximum3DDiameter

shape\_MeshVolume

shape\_MinorAxisLength

shape\_Sphericity

shape\_SurfaceArea

shape\_SurfaceVolumeRatio

shape\_VoxelVolume

### **Results for quantization with a fixed number of bins**

Using a fixed number of bins (N = 100) instead of a fixed bin width (N = 25) for quantization, the following results were obtained:

|                 | AUC-ROC<br>Original | AUC-ROC All      | AUC-ROC<br>Tuned | $\Delta_{All}$ -<br>Original | $P_{All}$ -<br>Original | $\Delta_{Tuned}$ -<br>Original | $P_{Tuned}$ -<br>Original | $\Delta_{Tuned}$ -<br>All | $P_{Tuned}$ -<br>All | Best Filter |
|-----------------|---------------------|------------------|------------------|------------------------------|-------------------------|--------------------------------|---------------------------|---------------------------|----------------------|-------------|
| <b>CRLM</b>     | 0.53 (0.4-0.66)     | 0.57 (0.44-0.7)  | 0.66 (0.53-0.78) | 0.04                         | 0.665                   | 0.13                           | 0.06                      | 0.09                      | 0.288                | lbp-3D      |
| <b>Desmoid</b>  | 0.73 (0.66-0.81)    | 0.78 (0.71-0.86) | 0.78 (0.71-0.85) | 0.05                         | 0.247                   | 0.05                           | 0.224                     | 0                         | 0.865                | log-sigma-  |
| <b>GIST</b>     | 0.68 (0.61-0.75)    | 0.76 (0.69-0.82) | 0.76 (0.7-0.82)  | 0.08                         | 0.01                    | 0.08                           | 0.001                     | 0                         | 0.781                | square_     |
| <b>HN</b>       | 0.78 (0.7-0.86)     | 0.78 (0.7-0.86)  | 0.85 (0.79-0.92) | 0                            | 0.996                   | 0.07                           | 0.028                     | 0.07                      | 0.053                | square_     |
| <b>Lipo</b>     | 0.77 (0.68-0.85)    | 0.82 (0.74-0.9)  | 0.85 (0.78-0.92) | 0.05                         | 0.281                   | 0.08                           | 0.035                     | 0.03                      | 0.504                | square_     |
| <b>Liver</b>    | 0.71 (0.63-0.78)    | 0.67 (0.59-0.75) | 0.71 (0.63-0.78) | -0.04                        | 0.366                   | 0                              | 1                         | 0.04                      | 0.366                | original_   |
| <b>Melanoma</b> | 0.54 (0.42-0.67)    | 0.49 (0.37-0.61) | 0.63 (0.51-0.75) | -0.05                        | 0.526                   | 0.09                           | 0.24                      | 0.14                      | 0.088                | square_     |

Although there are some differences visible when comparing with Table 4 (e.g., in AUC-ROC Original for CRLM and Lipo), the main conclusions still hold: In no case the AUC-ROCs of the original feature set are significantly better than those of the set of all features. Also, tuning the preprocessing filter never significantly loses performance.

Similarly, there is no large change in the trade-offs and the correlations:

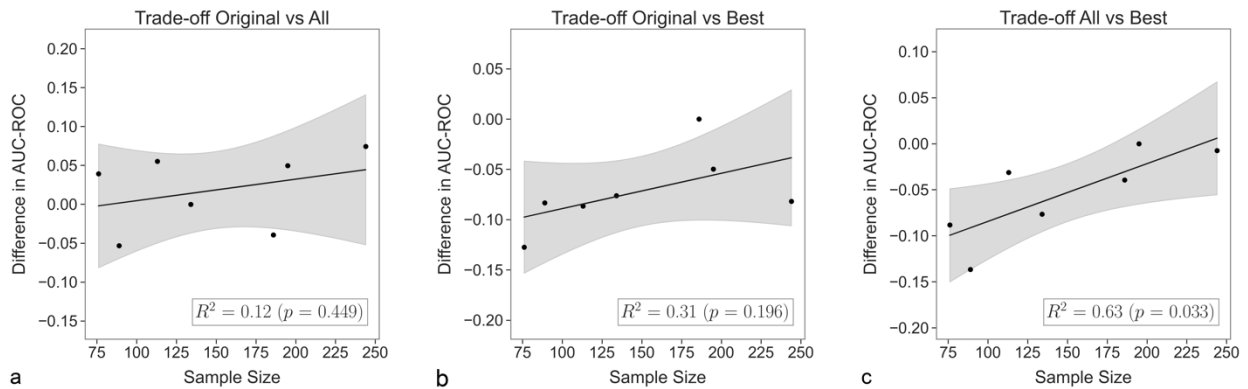

|             |          |             |          |       |       |           |        |            |         |
|-------------|----------|-------------|----------|-------|-------|-----------|--------|------------|---------|
| Original    | 1.0      | 0.759       | 0.801    | 0.665 | 0.765 | 0.714     | 0.8    | 0.842      | 0.838   |
| Exponential | 0.759    | 1.0         | 0.641    | 0.574 | 0.643 | 0.581     | 0.708  | 0.674      | 0.691   |
| Gradient    | 0.801    | 0.641       | 1.0      | 0.684 | 0.813 | 0.644     | 0.708  | 0.73       | 0.807   |
| LBP         | 0.665    | 0.574       | 0.684    | 1.0   | 0.674 | 0.6       | 0.596  | 0.634      | 0.717   |
| LoG         | 0.765    | 0.643       | 0.813    | 0.674 | 1.0   | 0.618     | 0.698  | 0.693      | 0.777   |
| Logarithm   | 0.714    | 0.581       | 0.644    | 0.6   | 0.618 | 1.0       | 0.647  | 0.906      | 0.672   |
| Square      | 0.8      | 0.708       | 0.708    | 0.596 | 0.698 | 0.647     | 1.0    | 0.694      | 0.728   |
| Squareroot  | 0.842    | 0.674       | 0.73     | 0.634 | 0.693 | 0.906     | 0.694  | 1.0        | 0.758   |
| Wavelet     | 0.838    | 0.691       | 0.807    | 0.717 | 0.777 | 0.672     | 0.728  | 0.758      | 1.0     |
|             | Original | Exponential | Gradient | LBP   | LoG   | Logarithm | Square | Squareroot | Wavelet |
